# Supplementary material for: A transcriptome-wide association study identifies susceptibility genes for Parkinson’s disease
Source: PubMed Central journal article supplement (PMC8429416; doi:10.1038/s41531-021-00221-7), 2021-09-09

Supplementary Table 1. Number of samples and significant heritable genes.

| Tissue                                | Abbreviation | <sup>a</sup> Sample Size | <sup>b</sup> Highly heritable genes |
|---------------------------------------|--------------|--------------------------|-------------------------------------|
| Brain Amygdala                        | AMY          | 120                      | 1,192                               |
| Brain Anterior cingulate cortex BA24  | ACC          | 137                      | 1,248                               |
| Brain Caudate basal ganglia           | CBG          | 174                      | 1,573                               |
| Brain Cerebellar hemisphere           | CEH          | 159                      | 2,010                               |
| Brain Cerebellum                      | CER          | 190                      | 2,606                               |
| Brain Cortex                          | COR          | 185                      | 1,769                               |
| Brain Frontal cortex BA9              | FRO          | 159                      | 1,549                               |
| Brain Hippocampus                     | HIP          | 152                      | 1,220                               |
| Brain Hypothalamus                    | HYP          | 158                      | 1,220                               |
| Brain Nucleus accumbens basal ganglia | NAB          | 183                      | 1,391                               |
| Brain Putamen basal ganglia           | PBG          | 155                      | 1,427                               |
| Brain Spinal cord cervical c-1        | SCC          | 116                      | 1,335                               |
| Brain Substantia nigra                | SUB          | 102                      | 1,092                               |
| Total                                 |              | 1,990                    | 19,632                              |

<sup>a</sup>Use only European samples; <sup>b</sup>The genes located in major histocompatibility complex (MHC) region were removed. The MHC region occurs on chromosome 6, between the flanking genetic markers *MOG* and *COL11A2* (from 6p22.1 to 6p21.3 about 29Mb to 33Mb on the hg38 assembly).

Supplementary Table 2. Significant TWAS genes for PD.

| Gene            | Chr        | Gene Start | Gene End | Tissue         | Best eQTL  | TWAS Z-score | TWAS P-value | Permutation P-value |
|-----------------|------------|------------|----------|----------------|------------|--------------|--------------|---------------------|
| <i>LRRC37A2</i> | chr17      | 46511511   | 46555650 | HYP            | rs17689918 | -9.63        | 6.12E-22     | 0.0256              |
|                 |            |            |          | NAB            | rs17762769 | -9.40        | 5.62E-21     | 0.0061              |
|                 |            |            |          | ACC            | rs17689471 | -9.30        | 1.44E-20     | 0.0373              |
|                 |            |            |          | SCC            | rs1396862  | -9.29        | 1.59E-20     | 0.0027              |
|                 |            |            |          | HIP            | rs17763086 | -9.23        | 2.62E-20     | 0.1430              |
|                 |            |            |          | CEH            | rs8072451  | -9.23        | 2.79E-20     | 0.0429              |
|                 |            |            |          | PBG            | rs1396862  | -9.22        | 3.06E-20     | 0.0033              |
|                 |            |            |          | COR            | rs17689824 | -9.22        | 3.07E-20     | 0.0241              |
|                 |            |            |          | CBG            | rs171440   | -9.20        | 3.46E-20     | 0.0241              |
|                 |            |            |          | AMY            | rs171440   | -9.20        | 3.52E-20     | 0.0044              |
|                 |            |            |          | CER            | rs4566211  | -9.02        | 1.82E-19     | 0.0030              |
|                 |            |            |          | FRO            | rs4566211  | -9.00        | 2.18E-19     | 0.0432              |
|                 |            |            |          | SUB            | rs199443   | -8.34        | 7.44E-17     | 0.0015              |
|                 |            |            |          | <i>LRRC37A</i> | chr17      | 46292733     | 46337794     | CER                 |
| SCC             | rs17762769 | -9.28      | 1.65E-20 |                |            |              |              | 0.0407              |
| CEH             | rs199449   | -7.70      | 1.40E-14 |                |            |              |              | 0.3158              |
| SUB             | rs4277389  | -7.57      | 3.65E-14 |                |            |              |              | 0.1188              |
| <i>MMRNI</i>    | chr4       | 89879532   | 89954629 | AMY            | rs35732828 | -4.99        | 6.06E-07     | 0.4140              |
|                 |            |            |          | FRO            | rs3857059  | 9.34         | 9.49E-21     | 0.0916              |
|                 |            |            |          | HIP            | rs10021524 | 5.48         | 4.32E-08     | 0.0863              |
|                 |            |            |          | SUB            | rs1398946  | 5.43         | 5.51E-08     | 0.5217              |
|                 |            |            |          | HYP            | rs1442138  | 5.33         | 9.89E-08     | 0.1008              |
| <i>ARL17A</i>   | chr17      | 46516702   | 46579682 | CEH            | rs7683789  | 4.98         | 6.33E-07     | 0.0415              |
|                 |            |            |          | PBG            | rs17762769 | -9.31        | 1.33E-20     | 0.0025              |
|                 |            |            |          | AMY            | rs17689471 | -9.30        | 1.44E-20     | 0.0035              |
|                 |            |            |          | NAB            | rs199533   | -9.12        | 7.74E-20     | 0.0075              |
|                 |            |            |          | COR            | rs199456   | -8.95        | 3.48E-19     | 0.0043              |
|                 |            |            |          | FRO            | rs17689918 | -8.85        | 8.41E-19     | 0.0063              |
|                 |            |            |          | HYP            | rs199536   | -8.81        | 1.22E-18     | 0.0033              |
|                 |            |            |          | CEH            | rs8072451  | -8.38        | 5.18E-17     | 0.0078              |
|                 |            |            |          | CER            | rs17689471 | -8.38        | 5.20E-17     | 0.0158              |
|                 |            |            |          | ACC            | rs35937770 | -7.84        | 4.55E-15     | 0.0119              |
|                 |            |            |          | HIP            | rs17689918 | -7.18        | 6.83E-13     | 0.0577              |
| <i>PLEKHM1</i>  | chr17      | 45435900   | 45490749 | CBG            | rs17762769 | -6.84        | 8.02E-12     | 0.0254              |
|                 |            |            |          | CEH            | rs17689918 | 8.94         | 3.76E-19     | 0.0001              |
|                 |            |            |          | CER            | rs171440   | 8.48         | 2.30E-17     | 0.0003              |
| <i>FMNL1</i>    | chr17      | 45221444   | 45247320 | CER            | rs17689471 | 8.65         | 4.95E-18     | 0.0007              |
|                 |            |            |          | CEH            | rs12449792 | 8.23         | 1.80E-16     | 0.0016              |
| <i>CD38</i>     | chr4       | 15778275   | 15853230 | COR            | rs1558451  | -6.85        | 7.52E-12     | 0.0006              |
|                 |            |            |          | PBG            | rs13124087 | -4.97        | 6.67E-07     | 0.0004              |
| <i>RNF40</i>    | chr16      | 30761745   | 30776307 | CEH            | rs7500719  | -6.24        | 4.42E-10     | 0.1936              |

|                |       |          |          |     |           |       |          |        |
|----------------|-------|----------|----------|-----|-----------|-------|----------|--------|
| <i>SPPL2C</i>  | chr17 | 45844835 | 45847072 | CEH | rs199456  | -6.00 | 1.98E-09 | 0.0541 |
|                |       |          |          | CER | rs3744760 | -4.89 | 1.01E-06 | 0.0960 |
| <i>VKORC1</i>  | chr16 | 31090842 | 31095980 | COR | rs8062719 | 5.95  | 2.66E-09 | 0.0176 |
| <i>CCDC189</i> | chr16 | 30757423 | 30762710 | COR | rs4889490 | 5.91  | 3.35E-09 | 0.0784 |
|                |       |          |          | NAB | rs1458201 | 5.59  | 2.23E-08 | 0.0569 |
| <i>GPNMB</i>   | chr7  | 23235967 | 23275108 | AMY | rs6461687 | 5.84  | 5.31E-09 | 0.0031 |
|                |       |          |          | CER | rs199355  | 5.79  | 7.00E-09 | 0.0043 |
|                |       |          |          | PBG | rs6461687 | 5.76  | 8.47E-09 | 0.0095 |
|                |       |          |          | COR | rs156429  | 5.73  | 1.02E-08 | 0.0146 |
|                |       |          |          | CBG | rs2072369 | 5.61  | 2.02E-08 | 0.0036 |
|                |       |          |          | ACC | rs199355  | 5.55  | 2.87E-08 | 0.0149 |
|                |       |          |          | NAB | rs7796541 | 5.45  | 4.90E-08 | 0.0033 |
|                |       |          |          | HYP | rs7796541 | 5.00  | 5.66E-07 | 0.0039 |
| <i>NUPL2</i>   | chr7  | 23181827 | 23201011 | CEH | rs7808488 | 5.69  | 1.24E-08 | 0.0096 |
|                |       |          |          | CER | rs7808488 | 5.65  | 1.65E-08 | 0.0146 |
| <i>MAP3K14</i> | chr17 | 45263121 | 45317040 | CER | rs9908905 | 5.51  | 3.52E-08 | 0.0001 |
| <i>ZSWIM7</i>  | chr17 | 15976560 | 15999717 | CEH | rs4792721 | -5.38 | 7.25E-08 | 0.0168 |
|                |       |          |          | FRO | rs2157991 | 5.20  | 2.04E-07 | 0.0625 |
|                |       |          |          | CER | rs1045599 | -5.19 | 2.05E-07 | 0.0577 |
|                |       |          |          | CBG | rs758853  | 5.11  | 3.29E-07 | 0.0132 |
|                |       |          |          | NAB | rs9891938 | 5.03  | 4.80E-07 | 0.0800 |
|                |       |          |          | COR | rs178797  | 4.93  | 8.22E-07 | 0.0945 |
|                |       |          |          | ACC | rs2157991 | 4.89  | 1.01E-06 | 0.0225 |
| <i>GAK</i>     | chr4  | 849276   | 932373   | CER | rs4974574 | 5.21  | 1.85E-07 | 0.0262 |
| <i>CENPV</i>   | chr17 | 16342534 | 16353656 | FRO | rs8076864 | 4.99  | 6.07E-07 | 0.0001 |
| <i>CPLX1</i>   | chr4  | 784957   | 826198   | CEH | rs1134921 | -4.98 | 6.36E-07 | 0.0531 |

Note: HYP, Brain Hypothalamus; NAB, Brain Nucleus accumbens basal ganglia; ACC, Brain Anterior cingulate cortex BA24; SCC, Brain Spinal cord cervical c-1; HIP, Brain Hippocampus; CEH, Brain Cerebellar Hemisphere; PBG, Brain Putamen basal ganglia; COR, Brain Cortex; CBG, Brain Caudate basal ganglia; AMY, Brain Amygdala; CER, Brain Cerebellum; FRO, Brain Frontal Cortex BA9; SUB, Brain Substantia nigra.

Supplementary Table 3. Replication results of the conditionally independent genes.

| Gene            | Tissue        | TWAS Z-score | TWAS P-value |
|-----------------|---------------|--------------|--------------|
| <b>LRRC37A2</b> | HIP           | -6.55        | 5.86E-11     |
|                 | HYP           | -6.41        | 1.41E-10     |
|                 | NAB           | -6.23        | 4.57E-10     |
|                 | SUB           | -6.23        | 4.61E-10     |
|                 | ACC           | -6.18        | 6.29E-10     |
|                 | CEH           | -6.17        | 6.70E-10     |
|                 | CER           | -6.11        | 9.85E-10     |
|                 | PBG           | -6.09        | 1.11E-09     |
|                 | SCC           | -6.08        | 1.19E-09     |
|                 | CBG           | -6.08        | 1.21E-09     |
|                 | AMY           | -6.08        | 1.23E-09     |
|                 | COR           | -6.01        | 1.80E-09     |
|                 | FRO           | -5.83        | 5.66E-09     |
|                 | <b>MMRN1</b>  | FRO          | 4.96         |
| CEH             |               | 3.93         | 8.39E-05     |
| HIP             |               | 3.91         | 9.30E-05     |
| HYP             |               | 3.53         | 4.10E-04     |
| PBG             |               | 3.04         | 2.34E-03     |
| SUB             |               | NA           | NA           |
| CD38            | CEH           | -3.12        | 1.79E-03     |
|                 | PBG           | -2.24        | 0.025        |
|                 | COR           | -2.17        | 0.030        |
|                 | CER           | -1.72        | 0.085        |
|                 | FRO           | -0.7         | 0.483        |
| RNF40           | CEH           | -3.06        | 2.20E-03     |
| <b>GPNMB</b>    | ACC           | 3.82         | 1.32E-04     |
|                 | PBG           | 3.78         | 1.54E-04     |
|                 | CER           | 3.78         | 1.56E-04     |
|                 | AMY           | 3.72         | 2.00E-04     |
|                 | COR           | 3.67         | 2.46E-04     |
|                 | HIP           | 3.63         | 2.85E-04     |
|                 | CBG           | 3.44         | 5.72E-04     |
|                 | NAB           | 3.05         | 2.30E-03     |
|                 | HYP           | 2.5          | 0.012        |
|                 | <b>ZSWIM7</b> | AMY          | -3.44        |
| CEH             |               | -0.76        | 0.447        |
| CER             |               | -0.66        | 0.508        |
| FRO             |               | 0.54         | 0.590        |
| ACC             |               | 0.46         | 0.648        |
| NAB             |               | 0.35         | 0.723        |
| HYP             |               | 0.35         | 0.726        |
| CBG             |               | 0.3          | 0.765        |

|              |     |       |          |
|--------------|-----|-------|----------|
|              | COR | NA    | NA       |
| GAK          | CER | 2.08  | 0.037    |
| <b>CPLX1</b> | CEH | -4.39 | 1.14E-05 |
|              | CER | -0.26 | 0.792    |

---

Supplementary Table 4. The 122 GWAS summary data from other public resources.

| Trait                                                 | Type           | Sample Size (Cases) | URL/pmid                                                                                                                                                  |
|-------------------------------------------------------|----------------|---------------------|-----------------------------------------------------------------------------------------------------------------------------------------------------------|
| Life satisfaction (univariate)                        | Activities     | 80852               | 30643256                                                                                                                                                  |
| Types of physical activity in last 4 weeks: Heavy DIY | Activities     | 384450 (165465)     | <a href="http://atlas.ctglab.nl/ukb2_sumstats">http://atlas.ctglab.nl/ukb2_sumstats</a>                                                                   |
| Weekly usage of mobile phone in last 3 months         | Activities     | 322862              | <a href="http://atlas.ctglab.nl/ukb2_sumstats">http://atlas.ctglab.nl/ukb2_sumstats</a>                                                                   |
| Duration walking for pleasure                         | Activities     | 323744              | <a href="https://cnsgenomics.com/software/gcta/#UKBiobankGWASresults">https://cnsgenomics.com/software/gcta/#UKBiobankGWASresults</a>                     |
| Health satisfaction                                   | Activities     | 150001              | <a href="https://cnsgenomics.com/software/gcta/#UKBiobankGWASresults">https://cnsgenomics.com/software/gcta/#UKBiobankGWASresults</a>                     |
| Mineral and other dietary supplements: Glucosamine    | Activities     | 454825 (88339)      | <a href="https://cnsgenomics.com/software/gcta/#UKBiobankGWASresults">https://cnsgenomics.com/software/gcta/#UKBiobankGWASresults</a>                     |
| Types of transport used (excluding work): Walk        | Activities     | 453928 (222804)     | <a href="https://cnsgenomics.com/software/gcta/#UKBiobankGWASresults">https://cnsgenomics.com/software/gcta/#UKBiobankGWASresults</a>                     |
| Usual walking pace                                    | Activities     | 453401              | <a href="https://cnsgenomics.com/software/gcta/#UKBiobankGWASresults">https://cnsgenomics.com/software/gcta/#UKBiobankGWASresults</a>                     |
| Vitamin and mineral supplements: Vitamin C            | Activities     | 453791 (39182)      | <a href="https://cnsgenomics.com/software/gcta/#UKBiobankGWASresults">https://cnsgenomics.com/software/gcta/#UKBiobankGWASresults</a>                     |
| Overall health rating                                 | Activities     | 454314              | <a href="https://cnsgenomics.com/software/gcta/#UKBiobankGWASresults">https://cnsgenomics.com/software/gcta/#UKBiobankGWASresults</a>                     |
| Non-cancer illness code, self-reported: hypertension  | Cardiovascular | 289307              | <a href="http://atlas.ctglab.nl/ukb2_sumstats">http://atlas.ctglab.nl/ukb2_sumstats</a>                                                                   |
| Pulse rate (automated reading)                        | Cardiovascular | 361411              | <a href="http://atlas.ctglab.nl/ukb2_sumstats">http://atlas.ctglab.nl/ukb2_sumstats</a>                                                                   |
| Hypertension                                          | Cardiovascular | 361141 (93560)      | <a href="https://www.dropbox.com">https://www.dropbox.com</a>                                                                                             |
| Diagnosed by doctor: High blood pressure              | Cardiovascular | 455303 (122620)     | <a href="https://cnsgenomics.com/software/gcta/#UKBiobankGWASresults">https://cnsgenomics.com/software/gcta/#UKBiobankGWASresults</a>                     |
| Systolic Blood Pressure (automated reading)           | Cardiovascular | 361402              | <a href="https://atlas.ctglab.nl">https://atlas.ctglab.nl</a>                                                                                             |
| High blood pressure                                   | Cardiovascular | 458554 (144793)     | <a href="ftp://ftp.ebi.ac.uk/pub/databases/gwas/summary_statistics">ftp://ftp.ebi.ac.uk/pub/databases/gwas/summary_statistics</a>                         |
| Resting heart rate                                    | Cardiovascular | 24218               | <a href="ftp://ftp.ebi.ac.uk/pub/databases/gwas/summary_statistics">ftp://ftp.ebi.ac.uk/pub/databases/gwas/summary_statistics</a>                         |
| Fluid intelligence test - Fluid intelligence score    | Cognitive      | 99739               | <a href="http://atlas.ctglab.nl/ukb2_sumstats">http://atlas.ctglab.nl/ukb2_sumstats</a>                                                                   |
| Intelligence                                          | Cognitive      | 269867              | <a href="https://ctg.cncr.nl/documents/p1651/SavageJansen_IntMeta_sumstats.zip">https://ctg.cncr.nl/documents/p1651/SavageJansen_IntMeta_sumstats.zip</a> |
| Verbal-numerical reasoning                            | Cognitive      | 168033              | 29844566                                                                                                                                                  |
| Cognitive performance                                 | Cognitive      | 257828              | <a href="https://www.thessgac.org/data">https://www.thessgac.org/data</a>                                                                                 |
| Fluid intelligence score                              | Cognitive      | 146808              | <a href="https://cnsgenomics.com/software/gcta/#UKBiobankGWASresults">https://cnsgenomics.com/software/gcta/#UKBiobankGWASresults</a>                     |
| Maximum digits remembered correctly                   | Cognitive      | 89799               | <a href="https://atlas.ctglab.nl">https://atlas.ctglab.nl</a>                                                                                             |
| Mean time to correctly identify matches               | Cognitive      | 383748              | <a href="https://atlas.ctglab.nl">https://atlas.ctglab.nl</a>                                                                                             |
| Lymphocyte count (three-way meta)                     | Immunological  | 171643              | <a href="https://cnsgenomics.com/software/gcta/#UKBiobankGWASresults">https://cnsgenomics.com/software/gcta/#UKBiobankGWASresults</a>                     |
| Lymphocyte percentage of white cells (three-way meta) | Immunological  | 171748              | <a href="https://cnsgenomics.com/software/gcta/#UKBiobankGWASresults">https://cnsgenomics.com/software/gcta/#UKBiobankGWASresults</a>                     |
| Mean corpuscular volume (three-way meta)              | Immunological  | 172433              | <a href="https://cnsgenomics.com/software/gcta/#UKBiobankGWASresults">https://cnsgenomics.com/software/gcta/#UKBiobankGWASresults</a>                     |
| Neutrophil percentage of white cells (three-way meta) | Immunological  | 171542              | <a href="https://cnsgenomics.com/software/gcta/#UKBiobankGWASresults">https://cnsgenomics.com/software/gcta/#UKBiobankGWASresults</a>                     |
| Granulocyte count (three-way meta)                    | Immunological  | 169822              | <a href="http://data.qld.edu.au/public/">http://data.qld.edu.au/public/</a>                                                                               |
| Lymphocyte count (two-way meta)                       | Immunological  | 132452              | <a href="ftp://ftp.sanger.ac.uk/pub/project/humgen/summary_statistics">ftp://ftp.sanger.ac.uk/pub/project/humgen/summary_statistics</a>                   |

|                                                     |               |        |                                                                                                                                                                   |
|-----------------------------------------------------|---------------|--------|-------------------------------------------------------------------------------------------------------------------------------------------------------------------|
| Lymphocyte percentage of white cells (two-way meta) | Immunological | 132570 | <a href="ftp://ftp.sanger.ac.uk/pub/project/humgen/summary_statistics">ftp://ftp.sanger.ac.uk/pub/project/humgen/summary_statistics</a>                           |
| Mean corpuscular hemoglobin (three-way meta)        | Immunological | 172332 | <a href="ftp://ftp.sanger.ac.uk/pub/project/humgen/summary_statistics">ftp://ftp.sanger.ac.uk/pub/project/humgen/summary_statistics</a>                           |
| Mean corpuscular hemoglobin (two-way meta)          | Immunological | 132224 | <a href="ftp://ftp.sanger.ac.uk/pub/project/humgen/summary_statistics">ftp://ftp.sanger.ac.uk/pub/project/humgen/summary_statistics</a>                           |
| Mean corpuscular volume (two-way meta)              | Immunological | 132353 | <a href="ftp://ftp.sanger.ac.uk/pub/project/humgen/summary_statistics">ftp://ftp.sanger.ac.uk/pub/project/humgen/summary_statistics</a>                           |
| Mean platelet volume (two-way meta)                 | Immunological | 127230 | <a href="ftp://ftp.sanger.ac.uk/pub/project/humgen/summary_statistics">ftp://ftp.sanger.ac.uk/pub/project/humgen/summary_statistics</a>                           |
| Neutrophil count (three-way meta)                   | Immunological | 170702 | <a href="ftp://ftp.sanger.ac.uk/pub/project/humgen/summary_statistics">ftp://ftp.sanger.ac.uk/pub/project/humgen/summary_statistics</a>                           |
| Neutrophil percentage of white cells (two-way meta) | Immunological | 132352 | <a href="ftp://ftp.sanger.ac.uk/pub/project/humgen/summary_statistics/">ftp://ftp.sanger.ac.uk/pub/project/humgen/summary_statistics/</a>                         |
| Blood urea nitrogen                                 | Metabolic     | 243031 | 31152163                                                                                                                                                          |
| Hip circumference                                   | Metabolic     | 385887 | <a href="http://atlas.ctglab.nl/ukb2_sumstats">http://atlas.ctglab.nl/ukb2_sumstats</a>                                                                           |
| Impedance of leg (left)                             | Metabolic     | 379807 | <a href="http://atlas.ctglab.nl/ukb2_sumstats">http://atlas.ctglab.nl/ukb2_sumstats</a>                                                                           |
| Impedance of leg (right)                            | Metabolic     | 379813 | <a href="http://atlas.ctglab.nl/ukb2_sumstats">http://atlas.ctglab.nl/ukb2_sumstats</a>                                                                           |
| Leg fat percentage (right)                          | Metabolic     | 379806 | <a href="http://atlas.ctglab.nl/ukb2_sumstats">http://atlas.ctglab.nl/ukb2_sumstats</a>                                                                           |
| Waist-hip ratio                                     | Metabolic     | 93480  | <a href="http://portals.broadinstitute.org/collaboration/giant/index.php/Main_Page">http://portals.broadinstitute.org/collaboration/giant/index.php/Main_Page</a> |
| Waist-hip ratio (adjusted for BMI)                  | Metabolic     | 210086 | <a href="http://portals.broadinstitute.org/collaboration/giant/index.php/Main_Page">http://portals.broadinstitute.org/collaboration/giant/index.php/Main_Page</a> |
| Waist-hip ratio (adjusted for BMI, female)          | Metabolic     | 116742 | <a href="http://portals.broadinstitute.org/collaboration/giant/index.php/Main_Page">http://portals.broadinstitute.org/collaboration/giant/index.php/Main_Page</a> |
| Body Mass Index                                     | Metabolic     | 322154 | <a href="http://portals.broadinstitute.org/collaboration/giant/index.php/Main_Page">http://portals.broadinstitute.org/collaboration/giant/index.php/Main_Page</a> |
| Body Mass Index (female)                            | Metabolic     | 171977 | <a href="http://portals.broadinstitute.org/collaboration/giant/index.php/Main_Page">http://portals.broadinstitute.org/collaboration/giant/index.php/Main_Page</a> |
| Comparative body size at age 10                     | Metabolic     | 448349 | <a href="https://cnsgenomics.com/software/gcta/#UKBiobankGWASresults">https://cnsgenomics.com/software/gcta/#UKBiobankGWASresults</a>                             |
| Arm fat-free mass (left)                            | Metabolic     | 379653 | <a href="http://atlas.ctglab.nl/ukb2_sumstats">http://atlas.ctglab.nl/ukb2_sumstats</a>                                                                           |
| Arm fat mass (left)                                 | Metabolic     | 379663 | <a href="http://atlas.ctglab.nl/ukb2_sumstats">http://atlas.ctglab.nl/ukb2_sumstats</a>                                                                           |
| Arm fat percentage (left)                           | Metabolic     | 379663 | <a href="http://atlas.ctglab.nl/ukb2_sumstats">http://atlas.ctglab.nl/ukb2_sumstats</a>                                                                           |
| Arm fat percentage (right)                          | Metabolic     | 379663 | <a href="http://atlas.ctglab.nl/ukb2_sumstats">http://atlas.ctglab.nl/ukb2_sumstats</a>                                                                           |
| Body fat percentage                                 | Metabolic     | 379615 | <a href="http://atlas.ctglab.nl/ukb2_sumstats">http://atlas.ctglab.nl/ukb2_sumstats</a>                                                                           |
| Impedance of arm (left)                             | Metabolic     | 379803 | <a href="http://atlas.ctglab.nl/ukb2_sumstats">http://atlas.ctglab.nl/ukb2_sumstats</a>                                                                           |
| Leg fat-free mass (left)                            | Metabolic     | 379766 | <a href="http://atlas.ctglab.nl/ukb2_sumstats">http://atlas.ctglab.nl/ukb2_sumstats</a>                                                                           |
| Leg fat-free mass (right)                           | Metabolic     | 379793 | <a href="http://atlas.ctglab.nl/ukb2_sumstats">http://atlas.ctglab.nl/ukb2_sumstats</a>                                                                           |
| Leg fat mass (left)                                 | Metabolic     | 379783 | <a href="http://atlas.ctglab.nl/ukb2_sumstats">http://atlas.ctglab.nl/ukb2_sumstats</a>                                                                           |
| Leg fat mass (right)                                | Metabolic     | 379802 | <a href="http://atlas.ctglab.nl/ukb2_sumstats">http://atlas.ctglab.nl/ukb2_sumstats</a>                                                                           |
| Leg fat percentage (left)                           | Metabolic     | 379786 | <a href="http://atlas.ctglab.nl/ukb2_sumstats">http://atlas.ctglab.nl/ukb2_sumstats</a>                                                                           |
| Leg predicted mass (right)                          | Metabolic     | 379793 | <a href="http://atlas.ctglab.nl/ukb2_sumstats">http://atlas.ctglab.nl/ukb2_sumstats</a>                                                                           |
| Trunk fat mass                                      | Metabolic     | 379578 | <a href="http://atlas.ctglab.nl/ukb2_sumstats">http://atlas.ctglab.nl/ukb2_sumstats</a>                                                                           |
| Trunk fat percentage                                | Metabolic     | 379600 | <a href="http://atlas.ctglab.nl/ukb2_sumstats">http://atlas.ctglab.nl/ukb2_sumstats</a>                                                                           |

|                                                                |           |                 |                                                                                                                                                         |
|----------------------------------------------------------------|-----------|-----------------|---------------------------------------------------------------------------------------------------------------------------------------------------------|
| Whole body fat-free mass                                       | Metabolic | 379804          | <a href="http://atlas.ctglab.nl/ukb2_sumstats">http://atlas.ctglab.nl/ukb2_sumstats</a>                                                                 |
| Whole body water mass                                          | Metabolic | 379835          | <a href="http://atlas.ctglab.nl/ukb2_sumstats">http://atlas.ctglab.nl/ukb2_sumstats</a>                                                                 |
| Waist circumference                                            | Metabolic | 455545          | <a href="https://cnsgenomics.com/software/gcta/#UKBiobankGWASresults">https://cnsgenomics.com/software/gcta/#UKBiobankGWASresults</a>                   |
| C-reactive protein                                             | Metabolic | 28520           | <a href="ftp://ftp.ebi.ac.uk/pub/databases/gwas/summary_statistics">ftp://ftp.ebi.ac.uk/pub/databases/gwas/summary_statistics</a>                       |
| Cancer (diagnosed by doctor)                                   | Other     | 385231          | <a href="http://atlas.ctglab.nl/ukb2_sumstats">http://atlas.ctglab.nl/ukb2_sumstats</a>                                                                 |
| Chest pain or discomfort when walking uphill or hurrying       | Other     | 48190           | <a href="http://atlas.ctglab.nl/ukb2_sumstats">http://atlas.ctglab.nl/ukb2_sumstats</a>                                                                 |
| Educational attainment                                         | Other     | 95427           | <a href="https://www.thessgac.org/data">https://www.thessgac.org/data</a>                                                                               |
| FEV1                                                           | Other     | 400102          | <a href="http://data.qld.edu.au/public/Q1031/UKB_impute_v1/3063.v1.fastGWA.gz">http://data.qld.edu.au/public/Q1031/UKB_impute_v1/3063.v1.fastGWA.gz</a> |
| Male pattern baldness (BOLT LMM non-infinitesimal mixed model) | Other     | 205327          | <a href="http://cnsgenomics.com/data/mpb/mpb_bolt_lmm_aut_x.tab.zip">http://cnsgenomics.com/data/mpb/mpb_bolt_lmm_aut_x.tab.zip</a>                     |
| Open-angle glaucoma                                            | Other     | 22795           | <a href="https://storage.googleapis.com/finngen-public-data-r2/summary_stats">https://storage.googleapis.com/finngen-public-data-r2/summary_stats</a>   |
| Age at cancer diagnosis                                        | Other     | 73638           | <a href="https://cnsgenomics.com/software/gcta/#UKBiobankGWASresults">https://cnsgenomics.com/software/gcta/#UKBiobankGWASresults</a>                   |
| Bread type: White                                              | Other     | 440084 (115996) | <a href="https://cnsgenomics.com/software/gcta/#UKBiobankGWASresults">https://cnsgenomics.com/software/gcta/#UKBiobankGWASresults</a>                   |
| Cereal intake                                                  | Other     | 435601          | <a href="https://cnsgenomics.com/software/gcta/#UKBiobankGWASresults">https://cnsgenomics.com/software/gcta/#UKBiobankGWASresults</a>                   |
| Cheese intake                                                  | Other     | 64001           | <a href="https://cnsgenomics.com/software/gcta/#UKBiobankGWASresults">https://cnsgenomics.com/software/gcta/#UKBiobankGWASresults</a>                   |
| Crohn's Disease                                                | Other     | 69268 (22575)   | <a href="https://www.ibdgenetics.org/downloads.html">https://www.ibdgenetics.org/downloads.html</a>                                                     |
| Fresh fruit intake                                             | Other     | 440074          | <a href="https://cnsgenomics.com/software/gcta/#UKBiobankGWASresults">https://cnsgenomics.com/software/gcta/#UKBiobankGWASresults</a>                   |
| Friendships satisfaction                                       | Other     | 148842          | <a href="https://cnsgenomics.com/software/gcta/#UKBiobankGWASresults">https://cnsgenomics.com/software/gcta/#UKBiobankGWASresults</a>                   |
| Hair colour (natural, before greying): Blonde                  | Other     | 385603 (43319)  | <a href="https://atlas.ctglab.nl">https://atlas.ctglab.nl</a>                                                                                           |
| FVC                                                            | Other     | 400102          | <a href="http://data.qld.edu.au/public/Q1031/UKB_impute_v1/3062.v1.fastGWA.gz">http://data.qld.edu.au/public/Q1031/UKB_impute_v1/3062.v1.fastGWA.gz</a> |
| Age first had sexual intercourse                               | Other     | 339614          | <a href="https://atlas.ctglab.nl">https://atlas.ctglab.nl</a>                                                                                           |
| Job involves mainly walking or standing                        | Other     | 259397          | <a href="https://cnsgenomics.com/software/gcta/#UKBiobankGWASresults">https://cnsgenomics.com/software/gcta/#UKBiobankGWASresults</a>                   |
| Hair/balding pattern: Pattern 1                                | Other     | 176380 (56514)  | <a href="https://atlas.ctglab.nl">https://atlas.ctglab.nl</a>                                                                                           |
| Hair/balding pattern: Pattern 4                                | Other     | 176380 (32228)  | <a href="https://atlas.ctglab.nl">https://atlas.ctglab.nl</a>                                                                                           |
| Never eat eggs, dairy, wheat, sugar: Wheat products            | Other     | 384986 (10236)  | <a href="https://atlas.ctglab.nl">https://atlas.ctglab.nl</a>                                                                                           |
| Number of self-reported cancers                                | Other     | 456269          | <a href="https://cnsgenomics.com/software/gcta/#UKBiobankGWASresults">https://cnsgenomics.com/software/gcta/#UKBiobankGWASresults</a>                   |
| Type 2 Diabetes                                                | Other     | 898130 (74124)  | <a href="http://diagram-consortium.org/downloads.html">http://diagram-consortium.org/downloads.html</a>                                                 |
| Ulcerative colitis                                             | Other     | 72647 (20417)   | <a href="https://www.ibdgenetics.org/downloads.html">https://www.ibdgenetics.org/downloads.html</a>                                                     |
| Oily fish intake                                               | Other     | 453893          | <a href="https://cnsgenomics.com/software/gcta/#UKBiobankGWASresults">https://cnsgenomics.com/software/gcta/#UKBiobankGWASresults</a>                   |
| Long-standing illness, disability or infirmity                 | Other     | 377498 (122262) | <a href="https://atlas.ctglab.nl">https://atlas.ctglab.nl</a>                                                                                           |
| Bilateral oophorectomy (both ovaries removed) (female)         | Other     | 205791 (16654)  | <a href="https://atlas.ctglab.nl">https://atlas.ctglab.nl</a>                                                                                           |
| Education - Qualifications                                     | Other     | 318526          | <a href="https://atlas.ctglab.nl">https://atlas.ctglab.nl</a>                                                                                           |



|                                                            |             |                 |                                                                                                                                                               |
|------------------------------------------------------------|-------------|-----------------|---------------------------------------------------------------------------------------------------------------------------------------------------------------|
| FEV1/FVC ratio                                             | Other       | 79055           | <a href="ftp://ftp.ebi.ac.uk/pub/databases/gwas/summary_statistics">ftp://ftp.ebi.ac.uk/pub/databases/gwas/summary_statistics</a>                             |
| Male pattern baldness (BOLT LMM infinitesimal mixed model) | Other       | 205327          | <a href="http://cnsgenomics.com/data/mpb/mpb_bolt_lmm_aut_x.tab.zip">http://cnsgenomics.com/data/mpb/mpb_bolt_lmm_aut_x.tab.zip</a>                           |
| Offspring birthweight (maternal)                           | Other       | 86577           | <a href="http://mccarthy.well.ox.ac.uk/publications">http://mccarthy.well.ox.ac.uk/publications</a>                                                           |
| PEF                                                        | Other       | 24218           | <a href="ftp://ftp.ebi.ac.uk/pub/databases/gwas/summary_statistics">ftp://ftp.ebi.ac.uk/pub/databases/gwas/summary_statistics</a>                             |
| Gestational weight gain (maternal, total)                  | Other       | 10555           | <a href="http://egg-consortium.org/downloads">http://egg-consortium.org/downloads</a>                                                                         |
| Ease of getting up in the morning                          | Psychiatric | 345552 (91820)  | <a href="https://ctg.cncr.nl">https://ctg.cncr.nl</a>                                                                                                         |
| General happiness                                          | Psychiatric | 126132          | <a href="http://atlas.ctglab.nl/ukb2_sumstats">http://atlas.ctglab.nl/ukb2_sumstats</a>                                                                       |
| Well-being spectrum                                        | Psychiatric | 2311184         | 30643256                                                                                                                                                      |
| Anxiety - Recent inability to stop or control worrying     | Psychiatric | 126300          | <a href="https://atlas.ctglab.nl">https://atlas.ctglab.nl</a>                                                                                                 |
| Current tobacco smoking                                    | Psychiatric | 455825          | <a href="https://cnsgenomics.com/software/gcta/#UKBiobankGWASresults">https://cnsgenomics.com/software/gcta/#UKBiobankGWASresults</a>                         |
| Frequency of drinking alcohol                              | Psychiatric | 147581          | <a href="https://cnsgenomics.com/software/gcta/#UKBiobankGWASresults">https://cnsgenomics.com/software/gcta/#UKBiobankGWASresults</a>                         |
| Getting up in morning                                      | Psychiatric | 455090          | <a href="https://cnsgenomics.com/software/gcta/#UKBiobankGWASresults">https://cnsgenomics.com/software/gcta/#UKBiobankGWASresults</a>                         |
| Happiness                                                  | Psychiatric | 146970          | <a href="https://cnsgenomics.com/software/gcta/#UKBiobankGWASresults">https://cnsgenomics.com/software/gcta/#UKBiobankGWASresults</a>                         |
| Been in serious accident believed to be life-threatening   | Psychiatric | 126665 (12432)  | <a href="https://atlas.ctglab.nl">https://atlas.ctglab.nl</a>                                                                                                 |
| Worrier / anxious feelings                                 | Psychiatric | 444404 (251982) | <a href="https://cnsgenomics.com/software/gcta/#UKBiobankGWASresults">https://cnsgenomics.com/software/gcta/#UKBiobankGWASresults</a>                         |
| Sleep duration (mean)                                      | Psychiatric | 384317          | <a href="https://ctg.cncr.nl/documents/p1651/Sleepdur_sumstats_Jansenetal.txt.gz">https://ctg.cncr.nl/documents/p1651/Sleepdur_sumstats_Jansenetal.txt.gz</a> |
| Neuroticism                                                | Psychiatric | 329821          | <a href="http://www.psy.ed.ac.uk/ccace/downloads/Luciano_2017.zip">http://www.psy.ed.ac.uk/ccace/downloads/Luciano_2017.zip</a>                               |
| Anorexia nervosa                                           | Psychiatric | 14477 (3495)    | <a href="https://www.med.unc.edu/pgc/results-and-downloads">https://www.med.unc.edu/pgc/results-and-downloads</a>                                             |
| Heel bone mineral density                                  | Skeletal    | 394929          | <a href="http://atlas.ctglab.nl/ukb2_sumstats">http://atlas.ctglab.nl/ukb2_sumstats</a>                                                                       |
| Comparative height size at age 10                          | Skeletal    | 448718          | <a href="https://cnsgenomics.com/software/gcta/#UKBiobankGWASresults">https://cnsgenomics.com/software/gcta/#UKBiobankGWASresults</a>                         |
| Non-cancer illness code, self-reported: osteoarthritis     | Skeletal    | 361141 (30046)  | <a href="https://www.dropbox.com">https://www.dropbox.com</a>                                                                                                 |
| Sitting height                                             | Skeletal    | 454934          | <a href="https://cnsgenomics.com/software/gcta/#UKBiobankGWASresults">https://cnsgenomics.com/software/gcta/#UKBiobankGWASresults</a>                         |
| Standing height                                            | Skeletal    | 452264          | <a href="http://geneatlas.roslin.ed.ac.uk/downloads/">http://geneatlas.roslin.ed.ac.uk/downloads/</a>                                                         |
| Total body BMD                                             | Skeletal    | 66628           | <a href="http://www.gefos.org/?q=documents">http://www.gefos.org/?q=documents</a>                                                                             |
| Birth length                                               | Skeletal    | 28459           | <a href="http://egg-consortium.org/downloads/EGG-GWAS-BL.txt.gz">http://egg-consortium.org/downloads/EGG-GWAS-BL.txt.gz</a>                                   |
| Estimated BMD                                              | Skeletal    | 142487          | <a href="http://www.gefos.org/sites/default/files/">http://www.gefos.org/sites/default/files/</a>                                                             |
| Height                                                     | Skeletal    | 49796           | <a href="ftp://ftp.ebi.ac.uk/pub/databases/gwas/summary_statistics">ftp://ftp.ebi.ac.uk/pub/databases/gwas/summary_statistics</a>                             |
| Osteoarthritis                                             | Skeletal    | 455221 (77052)  | <a href="ftp://ftp.ebi.ac.uk/pub/databases/gwas/summary_statistics">ftp://ftp.ebi.ac.uk/pub/databases/gwas/summary_statistics</a>                             |
| Osteoarthritis of hip                                      | Skeletal    | 393873 (15704)  | <a href="ftp://ftp.ebi.ac.uk/pub/databases/gwas/summary_statistics">ftp://ftp.ebi.ac.uk/pub/databases/gwas/summary_statistics</a>                             |

Supplementary Table 5. The significant TWAS results of the genes we identified in the Kia's paper.

| <sup>a</sup> Gene | Chr | <sup>b</sup> P0 | P1       | Z-score | P-value                | FDR                    |
|-------------------|-----|-----------------|----------|---------|------------------------|------------------------|
| <i>MMRNI</i>      | 4   | 89879532        | 89954629 | 10.21   | 1.86×10 <sup>-24</sup> | 2.52×10 <sup>-21</sup> |
| <i>CD38</i>       | 4   | 15778275        | 15853230 | -9.60   | 7.66×10 <sup>-22</sup> | 8.30×10 <sup>-19</sup> |
| <i>GPNMB</i>      | 7   | 23235967        | 23275108 | 8.51    | 1.69×10 <sup>-17</sup> | 1.53×10 <sup>-14</sup> |
| <i>NUPL2</i>      | 7   | 23181827        | 23201011 | 8.35    | 7.02×10 <sup>-17</sup> | 5.11×10 <sup>-14</sup> |
| <i>VKORC1</i>     | 16  | 31090842        | 31095980 | 5.34    | 9.42×10 <sup>-8</sup>  | 2.22×10 <sup>-5</sup>  |
| <i>CENPV</i>      | 17  | 16342534        | 16353656 | 3.63    | 2.86×10 <sup>-4</sup>  | 0.0158                 |
| <i>RNF40</i>      | 16  | 30761745        | 30776307 | -3.32   | 8.94×10 <sup>-4</sup>  | 0.0381                 |

<sup>a</sup>Genes are ordered by the TWAS *P*-value in CMC dorsolateral prefrontal cortex reported by Kia and colleagues;

<sup>b</sup>Gene positions are assigned to the CRCh38 human reference genome assembly. Note: Chr, chromosome; FDR, false discovery rate.

Supplementary Figure 1. Heatmap of the associations between each SNP in the final models of the 8 identified genes and the top five phenotypes (excluding PD) identified via pheWAS.

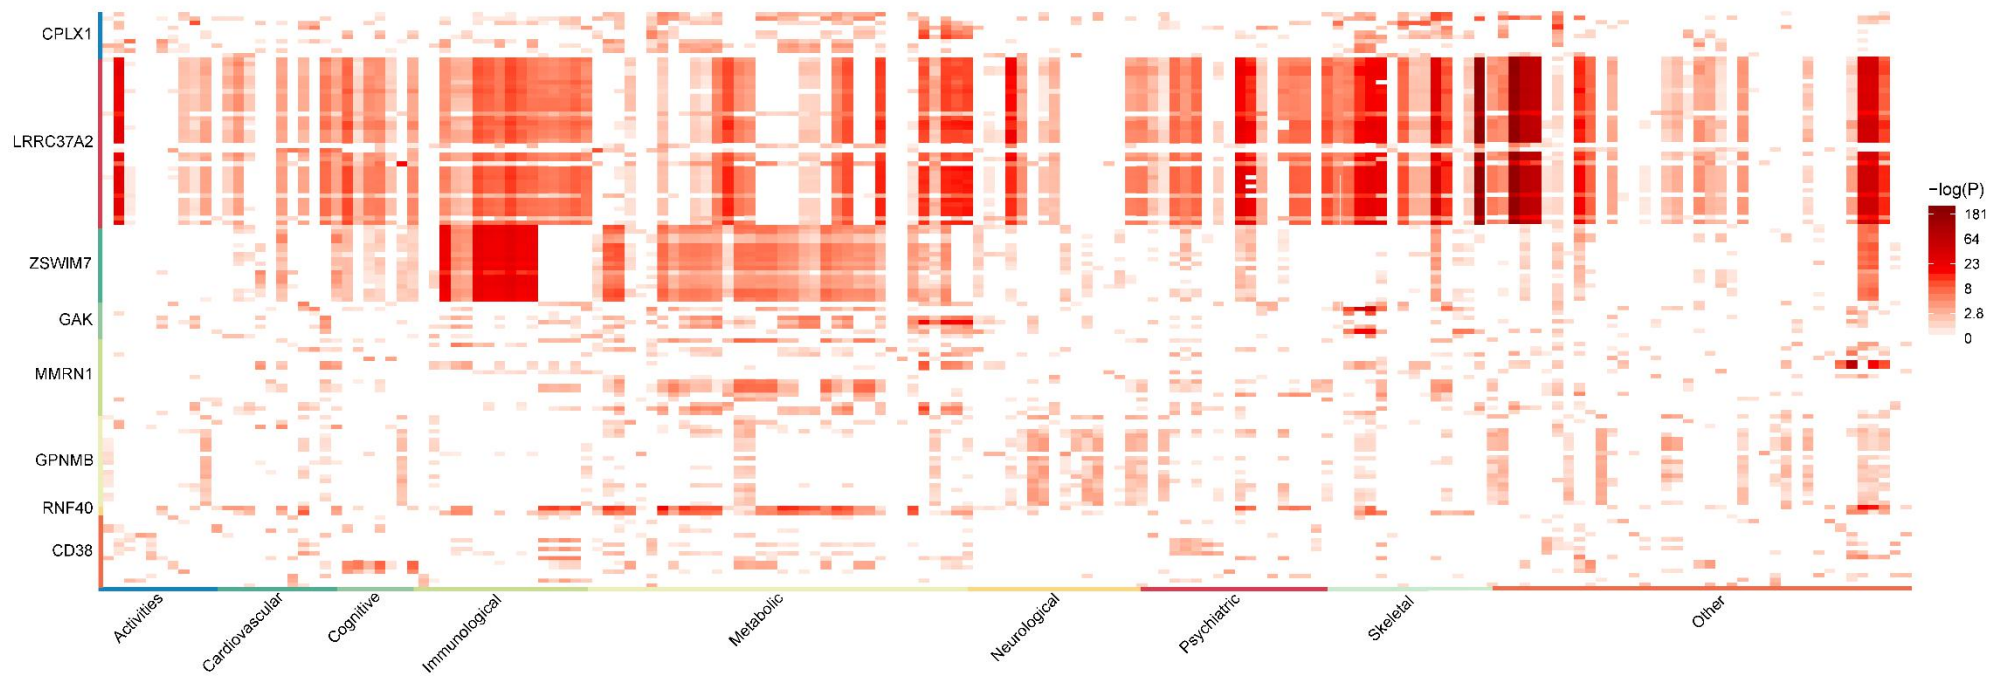

Supplement: 41531_2021_221_MOESM1_ESM.pdf [file 41531_2021_221_MOESM1_ESM.pdf]
